# Supplementary material for: Structural and Immunological Features of PR-10 Allergens: Focusing on the Major Alder Pollen Allergen Aln g 1
Source: MDPI journal article supplement (doi:10.3390/ijms25094965), 2024-05-02
Supplement: s1 [file s1]

# Structural and immunological features of PR-10 allergens: the focus on major alder pollen allergen Aln g 1

Daria N. Melnikova<sup>\*</sup>, Ekaterina I. Finkina<sup>1</sup>, Andrey E. Potapov<sup>1</sup>, Yulia D. Danilova<sup>1</sup>, Ilia Y. Toropygin<sup>2</sup>, Natalia S. Matveevskaya<sup>3</sup>, Tatiana V. Ovchinnikova<sup>1</sup>, Ivan V. Bogdanov<sup>1</sup>

1 M.M. Shemyakin & Yu.A. Ovchinnikov Institute of Bioorganic Chemistry, the Russian Academy of Sciences, 117997 Moscow, Russia, [contraton@mail.ru](mailto:contraton@mail.ru) (I.V.B.), [cool.goyan@yandex.ru](mailto:cool.goyan@yandex.ru) (A.E.P.), [finkina@mail.ru](mailto:finkina@mail.ru) (E.I.F.); [danilova-julia2307001@mail.ru](mailto:danilova-julia2307001@mail.ru) (Y.D.D.), [ovch@ibch.ru](mailto:ovch@ibch.ru) (T.V.O.)  
2 Institute of Biomedical Chemistry, 119121 Moscow, Russia; [toropygin@rambler.ru](mailto:toropygin@rambler.ru) (I.Y.T.)  
3 G.N. Gabrichevsky Research Institute for Epidemiology and Microbiology, 125212 Moscow, Russia, [matveevskaya@mail.ru](mailto:matveevskaya@mail.ru) (N.S.M.)  
<sup>\*</sup> Correspondence: [d\\_n\\_m@mail.ru](mailto:d_n_m@mail.ru) (D.N.M.).

**Table S1.** Characterization of patient sera containing sIgE to Aln g 1.

| No. | Age<br>(y.o.) | Sex<br>(M/F) | sIgE to birch |               | sIgE to alder |               | Another allergen source                    |
|-----|---------------|--------------|---------------|---------------|---------------|---------------|--------------------------------------------|
|     |               |              | IU/ml         | RAST<br>class | IU/ml         | RAST<br>class |                                            |
| 1   | 4             | M            | >100          | 6             | >100          | 6             | H, G, ct, wt, hz, p, po, wn, am, s         |
| 2   | 4             | M            | >100          | 6             | 55.12         | 5.1           | H, G                                       |
| 3   | 6             | M            | >100          | 6             | 8.95          | 3.3           | H, hz                                      |
| 4   | 5             | M            | >100          | 6             | >100          | 6             | H, G, O                                    |
| 5   | 5             | M            | 75.31         | 5.5           | 14.15         | 3.7           | H, G, p, wh, ct, hz, s                     |
| 6   | 2             | M            | >100          | 6             | >100          | 6             | H                                          |
| 7   | 7             | M            | 45.95         | 4.8           | 7.92          | 3.3           | H                                          |
| 8   | 4             | M            | 12.86         | 3.6           | 0.73          | 2             | H, G                                       |
| 9   | 3             | M            | >100          | 6             | >100          | 6             | H, G, O, hz, ct, wh, cl, ap, wn, am, po, s |
| 10  | 7             | M            | >100          | 6             | 9.2           | 3.4           | H, hz                                      |
| 11  | 6             | F            | 40 .64        | 4.7           | 9.7           | 3.4           | H                                          |
| 12  | 6             | M            | >100          | 6             | 85.39         | 5.7           | H, G                                       |
| 13  | 9             | M            | 90.88         | 5.8           | 16.74         | 3.9           | H, G, hz                                   |
| 14  | 8             | M            | >100          | 6             | >100          | 6             | H, hz, ct, po                              |

|    |    |   |       |     |       |     |                         |
|----|----|---|-------|-----|-------|-----|-------------------------|
| 15 | 6  | M | >100  | 6   | nd    | nd  | ct, ap                  |
| 16 | 6  | M | >100  | 6   | >100  | 6   | hz                      |
| 17 | 6  | F | >100  | 6   | nd    | nd  | ct, ap                  |
| 18 | 12 | F | >100  | 6   | >100  | 6   | H, O, wn, cl, ap, wh, r |
| 19 | 5  | F | >100  | 6   | 16.78 | 3.9 | H                       |
| 20 | 68 | M | >100  | 6   | 24.91 | 4.2 | H, O                    |
| 21 | 4  | M | >100  | 6   | 17.37 | 3.9 | H                       |
| 22 | 16 | F | >100  | 6   | 17.18 | 3.9 | H, O, hz                |
| 23 | 25 | M | >100  | 6   | 15.82 | 3.8 | H                       |
| 24 | 4  | M | 21.46 | 4.1 | nd    | nd  | s, hz, p, ct            |
| 25 | 11 | F | >100  | 6   | nd    | nd  | s, hz                   |

nd – not determined

Description of RAST classes: 0 class – not detectable or trace IgE level [0.00-0.34 IU/ml]; 1 class – threshold level [0.35-0.69 IU/ml]; 2 class – elevated IgE level [0.70-3.49 IU/ml]; 3 class - significantly elevated IgE level [3.50-17.49 IU/ml]; 4 class – high IgE level [17.5-49.99 IU/ml]; 5 class – very high IgE level [50.0-99.99 IU/ml]; 6 class - extremely high IgE level [ $\geq 100.0$  IU/ml].

Inhalant: G = grass pollen; H = hazel pollen; O=oak pollen.

Food: ct = carrot; po = potato; wh = wheat; hz = hazelnut; am = almond; wn = walnut; cl = celery; ap = apple; p=peanut, s=soybean.

**Table S2.** List of mutagenizing primers.

| Mutation     | Mutagenesis primer sequences (5'-3')                |
|--------------|-----------------------------------------------------|
| sD27A/L30A   | GCTTCAGGTGCAACCTTTGGTGCAGCTTTGCGCCATCAAGGATAAAGGCCT |
| ansD27A/L30A | CCAAAGGTTGCACCTGAAGCTGT                             |

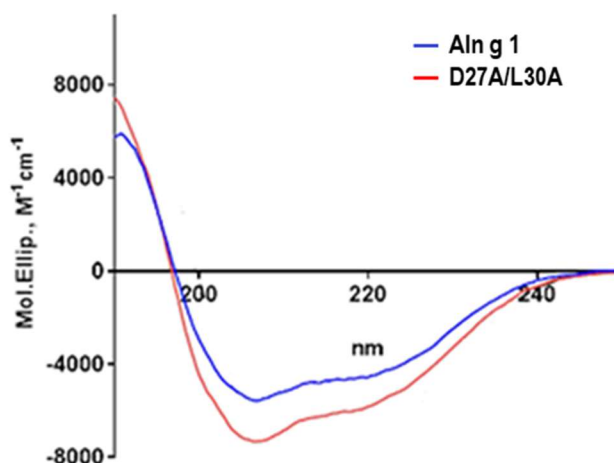

**Figure S1.** Overlay of the CD spectra of Aln g 1 and its mutant D27A/L30A measured at 25°C.
